# Supplementary material
Source: bioRxiv or medRxiv preprint supplement (https://www.biorxiv.org/highwire/filestream/53989/field_highwire_adjunct_files/0/164459-1.pdf)

## Supplementary information

**Table S1** Universal primers for Sanger sequencing. List of primer pairs used for the PCR amplification and Sanger sequencing of *Baetis rutilocylindratus* (Baetidae) and *Habrophlebiodes zijinensis* (Leptophlebiidae).

| Primer Name                       | Nucleotide sequence (5'-3') | Annealing temperature (°C) | No. of fragments |
|-----------------------------------|-----------------------------|----------------------------|------------------|
| <i>Baetis rutilocylindratus</i>   |                             |                            |                  |
| CO1F                              | ACAAATCATAAGGATATTGG        | 48                         | 1                |
| N-2329                            | ACTGTAAATATATGATGTGCTCA     | 48                         | 1                |
| C2-J-3696                         | GAAATTTGTGGAGCYAATCACAG     | 50                         | 2                |
| C3-N-5460                         | TGATACTGACATTTTGTGA         | 50                         | 2                |
| CB-J-11545                        | ACATGAATTGGAGCTCGACCAGT     | 53                         | 3                |
| LR-N-12945                        | GCGACCTCGATGTTGGATTAA       | 53                         | 3                |
| CRUST16SF                         | TAATTCAACATCGAGGTCGCAA      | 54                         | 4                |
| H13845-12Sb                       | GTGCCAGCAGCTGCGGTTA         | 54                         | 4                |
| CO1F                              | ACAAATCATAAGGATATTGG        | 49                         | 5                |
| RC2                               | GGGCAACTCCAGATTGACAC        | 49                         | 5                |
| FC2-3                             | CTTCTACAAGAGTGCTGGGA        | 51                         | 6                |
| RC2-3                             | CAACTAAGTGAAATGGGTGA        | 51                         | 6                |
| F-cob                             | ATTCCAAGGGCTTCACACT         | 49                         | 7                |
| RC3-cob                           | TAGAAAGTAAACCACCGTCA        | 49                         | 7                |
| F16n                              | TTAGAAAAGCCACCCCGAT         | 55                         | 8                |
| R16n                              | GGACGAGAAGACCCCATAGA        | 55                         | 8                |
| F16-C1                            | TAAATCCTTATGTACGGCACG       | 55                         | 9                |
| R16-C1                            | TAAATCCTTATGTACGGCACG       | 55                         | 9                |
| F12-C1                            | CCCCTTGCCCTCATCGTCTAA       | 59                         | 10               |
| R12-C1                            | CTCCGAATGCTTCCTTCTTGC       | 59                         | 10               |
| <i>Habrophlebiodes zijinensis</i> |                             |                            |                  |
| CO1F                              | ACAAATCATAAGGATATTGG        | 48                         | 1                |
| N-2329                            | ACTGTAAATATATGATGTGCTCA     | 48                         | 1                |
| N5-J-6579                         | TTCTCATCATCCTTGATC          | 51                         | 2                |
| N4-N-8484                         | GCTAATATGGCTGCTCCTCC        | 51                         | 2                |
| CB-J-11545                        | ACATGAATTGGAGCTCGACCAGT     | 53                         | 3                |
| LR-N-12945                        | GCGACCTCGATGTTGGATTAA       | 53                         | 3                |
| CRUST16SF                         | TAATTCAACATCGAGGTCGCAA      | 54                         | 4                |
| H13845-12Sb                       | GTGCCAGCAGCTGCGGTTA         | 54                         | 4                |
| TM-J-206                          | GCTAAGBTAAAGCTAATAGTTTCAT   | 47                         | 5                |
| ZR16-CI                           | TAGAAACACGAAACCGAGGGACCA    | 47                         | 5                |
| FCOI-CB1                          | TTTTCTCCCTCCATTTAGCC        | 49                         | 6                |
| N5-N-6562                         | GATCAAGGKTGAAGAGAA          | 49                         | 6                |
| FzN4-CB                           | ATAAACTCACGAACTCTCCAG       | 51                         | 7                |
| RzN4-CB                           | TTTTTGTGTGTGCCGTTGA         | 51                         | 7                |
| Fz1-5n                            | GCTGCCTGATACTGACATT         | 44                         | 8                |
| Rz1-5                             | ATTATGTTTTTAGGGTCAA         | 44                         | 8                |

**Table S2** Overview of ephemeropteran mitochondrial genomes. Total sequence length in base pairs (bp) and individual nucleotide compositions of mayfly mitochondrial genomes calculated based on the whole available sequences and the ones corrected for the incomplete mitochondrial genomes (see 2. Material and methods section)

| Family          | Species                           | Length [bp]         | A%   | C%   | G%   | T%   | GC%  | AT%  | Reference                 |
|-----------------|-----------------------------------|---------------------|------|------|------|------|------|------|---------------------------|
| Ameletidae      | <i>Ameletus</i> sp1               | 15,141              | 33.2 | 13.7 | 20.6 | 32.5 | 34.2 | 65.7 | (Tang et al., 2014)       |
|                 |                                   | 12,305              | 33.1 | 13.9 | 20.7 | 32.3 | 34.6 | 65.4 |                           |
| Baetidae        | <i>Alainites yixiani</i>          | 14,589 <sup>a</sup> | 29.1 | 15.5 | 20.5 | 34.9 | 36.0 | 64.0 | (Jia & Zhou unpublished)  |
|                 |                                   | 12,130              | 28.8 | 14.7 | 21.0 | 35.5 | 35.7 | 64.3 |                           |
| Baetidae        | <i>Baetis rutilocylindratus</i>   | 14,883 <sup>a</sup> | 27.3 | 19.8 | 20.1 | 32.8 | 39.9 | 60.1 | this study                |
|                 |                                   | 12,234              | 26.7 | 19.8 | 20.4 | 33.2 | 40.2 | 59.9 |                           |
| Baetidae        | <i>Cloeon dipterum</i>            | 14,355              | 30.6 | 14.7 | 16.3 | 38.4 | 30.9 | 69.0 | this study                |
|                 |                                   | 12,197              | 29.9 | 14.5 | 16.9 | 38.7 | 31.4 | 68.6 |                           |
| Caenidae        | <i>Caenis pycnacantha</i>         | 15,351 <sup>a</sup> | 32.4 | 20.8 | 14.2 | 32.5 | 35.1 | 64.9 | (Jia & Zhou unpublished)  |
|                 |                                   | 12,301              | 31.8 | 21.4 | 15.3 | 31.6 | 36.7 | 63.4 |                           |
| Ephemerellidae  | <i>Ephemerella</i> sp.            | 14,896              | 30.4 | 21.9 | 16.3 | 31.4 | 38.2 | 61.8 | (Tang et al., 2014)       |
|                 |                                   | 12,233              | 30.4 | 21.6 | 17.1 | 31.0 | 38.6 | 61.4 |                           |
| Ephemerellidae  | <i>Vietnamella dabieshanensis</i> | 15,761 <sup>a</sup> | 32.1 | 17.6 | 11.8 | 38.6 | 29.4 | 70.7 | (Wang & Zhou unpublished) |
|                 |                                   | 12,286              | 32.5 | 18.1 | 12.3 | 37.1 | 30.4 | 69.6 |                           |
| Ephemerellidae  | <i>Vietnamella</i> sp.            | 15,043              | 30.8 | 20.5 | 13.5 | 35.2 | 34.0 | 66.0 | (Tang et al., 2014)       |
|                 |                                   | 12,788              | 30.8 | 21.0 | 13.9 | 34.3 | 34.9 | 65.1 |                           |
| Ephemeridae     | <i>Ephemera orientalis</i>        | 16,463 <sup>a</sup> | 37.2 | 17.4 | 10.3 | 35.0 | 27.7 | 72.2 | (Lee et al., 2009)        |
|                 |                                   | 12,366              | 36.3 | 18.2 | 11.4 | 34.1 | 29.6 | 70.4 |                           |
| Heptageniidae   | <i>Epeorus</i> sp.                | 15,456              | 31.7 | 22.1 | 13.8 | 32.3 | 35.9 | 64.0 | (Tang et al., 2014)       |
|                 |                                   | 12,371              | 31.0 | 22.8 | 14.4 | 31.8 | 37.2 | 62.8 |                           |
| Heptageniidae   | <i>Paegniodes cupulatus</i>       | 15,715 <sup>a</sup> | 32.5 | 20.7 | 13.7 | 33.1 | 34.4 | 65.6 | (Wang & Zhou unpublished) |
|                 |                                   | 12,366              | 32.2 | 20.8 | 13.6 | 33.4 | 34.3 | 65.6 |                           |
| Heptageniidae   | <i>Parafronurus youi</i>          | 15,481 <sup>a</sup> | 32.7 | 20.5 | 13.1 | 33.7 | 33.6 | 66.4 | (Zhang et al., 2008)      |
|                 |                                   | 12,361              | 32.9 | 20.2 | 12.9 | 34.0 | 33.0 | 66.9 |                           |
| Isonychiidae    | <i>Isonychia ignota</i>           | 15,105 <sup>a</sup> | 30.5 | 23.4 | 14.9 | 31.2 | 38.3 | 61.7 | (Qin et al. unpublished)  |
|                 |                                   | 12,318              | 30.6 | 23.6 | 15.0 | 30.8 | 38.6 | 61.4 |                           |
| Leptophlebiidae | <i>Habrophlebiodes zijinensis</i> | 15,407              | 33.8 | 20.2 | 11.0 | 35.1 | 31.2 | 68.9 | this study                |
|                 |                                   | 12,417              | 33.6 | 20.6 | 11.5 | 34.3 | 32.1 | 67.9 |                           |
| Potamanthidae   | <i>Potamanthus</i> sp.            | 14,937              | 32.8 | 19.4 | 13.6 | 34.1 | 33.1 | 66.9 | (Tang et al., 2014)       |
|                 |                                   | 12,289              | 32.5 | 19.5 | 14.2 | 33.9 | 33.6 | 66.4 |                           |
| Siphonuridae    | <i>Siphonurus immanis</i>         | 15,529 <sup>a</sup> | 35.2 | 17.6 | 11.7 | 35.4 | 29.3 | 70.6 | (Hua et al. unpublished)  |
|                 |                                   | 12,339              | 34.7 | 18.0 | 12.2 | 35.1 | 30.2 | 69.8 |                           |
| Siphonuridae    | <i>Siphonurus</i> sp.             | 14,745              | 31.5 | 20.9 | 14.7 | 32.9 | 35.6 | 64.4 | (Tang et al., 2014)       |
|                 |                                   | 12,333              | 31.0 | 21.0 | 15.1 | 32.9 | 36.1 | 63.9 |                           |
| Siphuriscidae   | <i>Siphuriscus chinensis</i>      | 16,616              | 33.9 | 19.0 | 14.4 | 32.6 | 33.4 | 66.5 | (Li et al., 2014)         |
|                 |                                   | 12,394              | 33.5 | 19.6 | 14.3 | 32.7 | 33.9 | 66.2 |                           |
| Teloganodidae   | sp.                               | 15,252              | 30.1 | 21.9 | 14.4 | 33.6 | 36.3 | 63.7 | (Tang et al., 2014)       |
|                 |                                   | 12,208              | 29.8 | 22.6 | 15.1 | 32.6 | 37.6 | 62.4 |                           |

<sup>a</sup>, Indicates complete mitochondrial genomes; rest are incomplete mitochondrial genomes.

## References

Lee, E.M., Hong, M.Y., Kim, M.I., Kim, M.J., Park, H.C., Kim, K.Y., Lee, I.H., Bae, C.H., Jin, B.R., Kim, I., 2009. The complete mitogenome sequences of the palaeopteran insects *Ephemera orientalis*

(Ephemeroptera: Ephemeridae) and *Davidius lunatus* (Odonata: Gomphidae). *Genome* 52, 810–817. doi:10.1139/g09-055

Li, D., Qin, J.-C., Zhou, C.-F., 2014. The phylogeny of Ephemeroptera in Pterygota revealed by the mitochondrial genome of *Siphuriscus chinensis* (Hexapoda: Insecta). *Gene* 545, 132–140. doi:10.1016/j.gene.2014.04.059

Tang, M., Tan, M., Meng, G., Yang, S., Su, X., Liu, S., Song, W., Li, Y., Wu, Q., Zhang, A., Zhou, X., 2014. Multiplex sequencing of pooled mitochondrial genomes--a crucial step toward biodiversity analysis using mito-metagenomics. *Nucleic Acids Res.* 42, e166–e166. doi:10.1093/nar/gku917

Zhang, J., Zhou, C., Gai, Y., Song, D., Zhou, K., 2008. The complete mitochondrial genome of *Parafonurus youi* (Insecta: Ephemeroptera) and phylogenetic position of the Ephemeroptera. *Gene* 424, 18–24. doi:10.1016/j.gene.2008.07.037

**Fig. S1** Phylogenetic relationships of insect major orders using Bayesian inference reconstruction based on mitochondrial genome data using the concatenated amino acid sequences of the all\_taxa matrix (see Table 1). Filled circles indicate well-supported nodes; whereby black circles represent Bayesian posterior probability (BPP) = 1, and grey circles BPP  $\geq 0.95$ . Scale bar indicates substitutions per site. Coloured tip labels refer to the orders, whereby light blue = Archaeognatha (AR), dark blue = Blattodea (BL), light green = Ephemeroptera (EP), dark green = Grylloblattodea (GR), red = Isoptera (IS), light orange = Mantodea (MT), dark red = Mantophasmatodea (MP), dark orange = Odonata (OD), light purple = Orthoptera (OR), dark purple = Phasmatodea, yellow = Plecoptera (PL), and brown = Zygentoma (ZY). Five taxa being excluded from the optimized\_taxa matrix are coloured in dark grey.

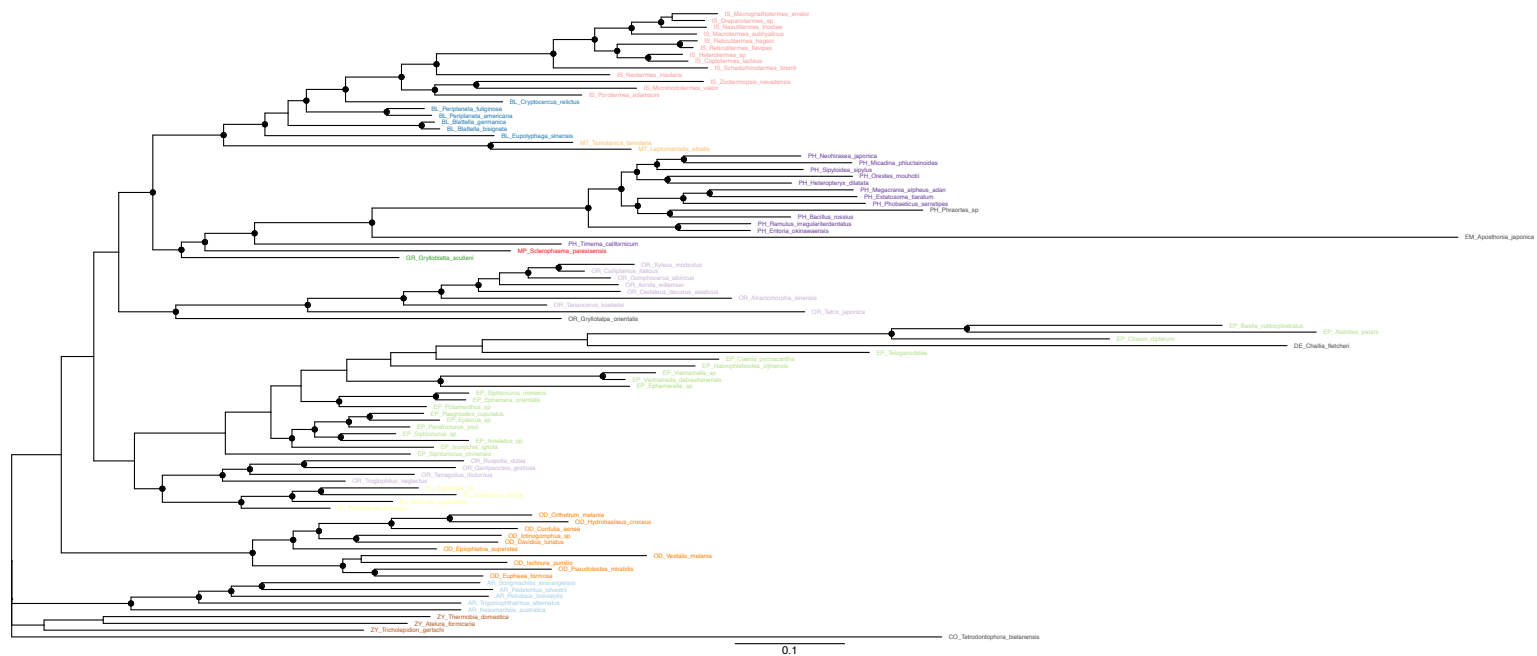

**Fig. S2** Phylogenetic relationships of insect major orders using maximum likelihood reconstruction based on mitochondrial genome data using the concatenated amino acid sequences of the optimized\_taxa matrix (see Table 1). Filled circles indicate well-supported nodes; whereby black circles represent Bootstrap Support (BS)  $\geq 90$ , and grey circles BS  $\geq 80$ . Scale bar indicates substitutions per site. Coloured tip labels refer to the orders (for details see Fig. S1).

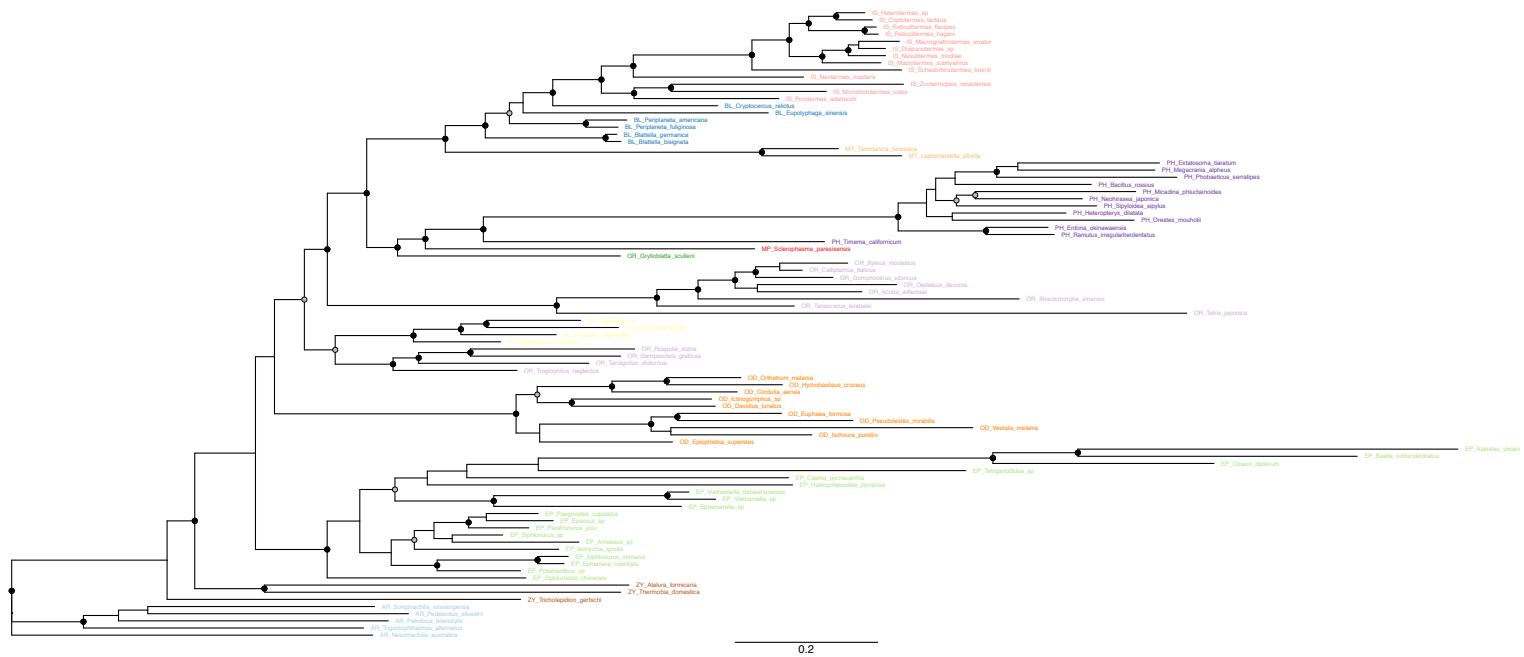

Supplement: Supplementary file [file 164459-1.pdf]
